# Supplementary material for: Serotonin-norepinephrine reuptake inhibitors may exacerbate stiff-person syndrome
Source: PubMed Central journal article supplement — Neurol Neuroimmunol Neuroinflamm. 2016 Sep 28;3(6):e281. doi: 10.1212/NXI.0000000000000281 (PMC5004527; doi:10.1212/nxi.0000000000000281), 2016-09-28
Supplement: supp_3.6.e281_table_e-1.pdf [file supp_3.6.e281_table_e-1.pdf]

| Characteristics of patient population                                                                                                                                                                                                                                                                         |           |
|---------------------------------------------------------------------------------------------------------------------------------------------------------------------------------------------------------------------------------------------------------------------------------------------------------------|-----------|
| Patient characteristics                                                                                                                                                                                                                                                                                       | N = 4     |
| Female sex                                                                                                                                                                                                                                                                                                    | 3         |
| Age at onset, y [SD]                                                                                                                                                                                                                                                                                          | 36 [13.4] |
| Age range, y                                                                                                                                                                                                                                                                                                  | 23 – 51   |
| Time since symptom onset (months), mean [SD]                                                                                                                                                                                                                                                                  | 66 [48.3] |
| Clinical features                                                                                                                                                                                                                                                                                             |           |
| - Stiffness or rigidity, spasms, and pain                                                                                                                                                                                                                                                                     | 4         |
| - Hyperekplexia                                                                                                                                                                                                                                                                                               | 2 (1,4)   |
| EMG consistent with SPS                                                                                                                                                                                                                                                                                       | 3 (1,2,3) |
| GAD65 antibodies                                                                                                                                                                                                                                                                                              | 4         |
| Cancer history                                                                                                                                                                                                                                                                                                | 0         |
| Systemic autoimmune disorder                                                                                                                                                                                                                                                                                  | 1 (4)     |
| Immunotherapy history                                                                                                                                                                                                                                                                                         |           |
| - Steroids                                                                                                                                                                                                                                                                                                    | 1 (4)     |
| - IVIG                                                                                                                                                                                                                                                                                                        | 4         |
| - Plasmapheresis (PLEX)                                                                                                                                                                                                                                                                                       | 1 (4)     |
| - Rituximab                                                                                                                                                                                                                                                                                                   | 2 (3,4)   |
| SSRI use history                                                                                                                                                                                                                                                                                              | 3 (2,3,4) |
| TCA use history                                                                                                                                                                                                                                                                                               | 1 (4)     |
| SD: standard deviation; EMG consistent with SPS: continuous motor unit activity, failure of reciprocal inhibition of antagonistic muscles, or paraspinal motor unit activity; IVIG: intravenous immunoglobulin; SSRI: selective serotonin reuptake inhibitor; Numbers in parentheses indicate relevant cases. |           |

table e-1. Characteristics of patient population. SD: standard deviation; EMG consistent with SPS: continuous motor unit activity, failure of reciprocal inhibition of antagonistic muscles, or paraspinal motor unit activity; GAD65: glutamic acid decarboxylase, 65kDa isoform; IVIG: intravenous immunoglobulin; SSRI: selective serotonin reuptake inhibitor; TCA: tricyclic antidepressant. Numbers in parentheses indicate relevant cases.
