# Supplementary material for: Serotonin-norepinephrine reuptake inhibitors may exacerbate stiff-person syndrome
Source: PubMed Central journal article supplement — Neurol Neuroimmunol Neuroinflamm. 2016 Sep 28;3(6):e281. doi: 10.1212/NXI.0000000000000281 (PMC5004527; doi:10.1212/nxi.0000000000000281), 2016-09-28
Supplement: supp_3.6.e281_table_e-2.pdf [file supp_3.6.e281_table_e-2.pdf]

| SNRI use in patients                                                                                                       |           |
|----------------------------------------------------------------------------------------------------------------------------|-----------|
| Patient characteristics                                                                                                    | N = 4     |
| Time since symptom onset (months), mean [SD]                                                                               | 28 [27.4] |
| Clinical features noted or exacerbated                                                                                     |           |
| - Stiffness or rigidity, spasms, and pain                                                                                  | 4         |
| - Gait instability                                                                                                         | 2 (1,4)   |
| - Respiratory distress                                                                                                     | 1 (3)     |
| - Cognitive impairment                                                                                                     | 1 (2)     |
| SD: standard deviation; SNRI: serotonin-norepinephrine reuptake inhibitor; Numbers in parentheses indicate relevant cases. |           |

table e-2. Serotonin-norepinephrine reuptake inhibitor use in patients. SD: standard deviation; SNRI: serotonin-norepinephrine reuptake inhibitor. Numbers in parentheses indicate relevant cases.
